# Supplementary material
Source: PubMed Central journal article supplement (PMC4054385)
Supplement: JVI.00541-14_zjv999099095so1.pdf [file JVI.00541-14_zjv999099095so1.pdf]

| Day               | DV1 |        |         |          | DV2 |      |          |         | DV3 |         |         |          | DV4 |      |          |          |
|-------------------|-----|--------|---------|----------|-----|------|----------|---------|-----|---------|---------|----------|-----|------|----------|----------|
|                   | 0   | 14     | 30      | 62       | 0   | 14   | 30       | 62      | 0   | 14      | 30      | 62       | 0   | 14   | 30       | 62       |
| Animal            |     |        |         |          |     |      |          |         |     |         |         |          |     |      |          |          |
| 4 (1427)          | 10  | 2560   | 640     | 640      | 10  | 10   | 2560     | 2560    | 10  | 160     | 640     | 2560     | 10  | 10   | 2560     | 10       |
| 5 (1272)          | 10  | 640    | 1280    | 160      | 10  | 160  | 1280     | 2560    | 10  | 2560    | 160     | 2560     | 10  | 160  | 2560     | 20       |
| 35 (1253)         | 10  | 120    | 2560    | 640      | 10  | 1280 | 2560     | 160     | 10  | 1280    | 2560    | 2560     | 10  | 10   | 1280     | 2560     |
| 42 (1407)         | 10  | 1260   | 1280    | 2560     | 10  | 320  | 10       | 640     | 10  | 10      | 2560    | 2560     | 10  | 2560 | 1280     | 640      |
| WT-Tet GMT        | 10  | 705    | 1280    | 640      | 10  | 160  | 538      | 905     | 10  | 269     | 905     | 2560     | 10  | 80   | 1810     | 135      |
| 6 (1301)          | 10  | 10     | 640     | 1280     | 10  | 10   | 10       | 2560    | 10  | 320     | 2560    | 80       | 10  | 10   | 1280     | 2560     |
| 15 (1151)         | 10  | 10     | 40      | 1280     | 10  | 10   | 10       | 320     | 10  | 1280    | 1280    | 160      | 10  | 10   | 640      | 2560     |
| 25 (1095)         | 10  | 40     | 640     | 2560     | 10  | 80   | 160      | 10      | 10  | 1280    | 2560    | 320      | 10  | 10   | 80       | 160      |
| 30 (1115)         | 10  | 10     | 10      | 160      | 10  | 10   | 2560     | 2560    | 10  | 10      | 1280    | 640      | 10  | 640  | 2560     | 2560     |
| 1 (1405)          | 10  | 10     | 640     | 2560     | 10  | 80   | 160      | 2560    | 10  | 2560    | 10      | 320      | 10  | 10   | 2560     | 2560     |
| 10 (1463)         | 10  | 10     | 2560    | 640      | 10  | 10   | 320      | 10      | 10  | 80      | 10      | 10       | 10  | 10   | 640      | 160      |
| 16 (1157)         | 10  | 10     | 2560    | 10       | 10  | 10   | 320      | 2560    | 10  | 1280    | 2560    | 40       | 10  | 10   | 320      | 2560     |
| 18 (1178)         | 10  | 20     | 2560    | 1280     | 10  | 2560 | 2560     | 160     | 10  | 1280    | 160     | 20       | 10  | 10   | 1280     | 320      |
| 2 (1411)          | 10  | 10     | 80      | 1280     | 10  | 640  | 640      | 1280    | 10  | 20      | 10      | 640      | 10  | 10   | 320      | 640      |
| 22 (1083)         | 10  | 80     | 80      | 2560     | 10  | 640  | 10       | 320     | 10  | 2560    | 40      | 80       | 10  | 10   | 2560     | 40       |
| 29 (1114)         | 10  | 2560   | 10      | 160      | 10  | 2560 | 40       | 10      | 10  | 20      | 10      | 160      | 10  | 10   | 2560     | 160      |
| 40 (1420)         | 10  | 2560   | 1280    | 2560     | 10  | 2560 | 1280     | 10      | 10  | 640     | 320     | 10       | 10  | 10   | 2560     | 10       |
| 8 (1454)          | 10  | 2560   | 10      | 160      | 10  | 80   | 1280     | 640     | 10  | 10      | 10      | 320      | 10  | 10   | 1280     | 20       |
| 13 (1133)         | 10  | 2560   | 10      | 1280     | 10  | 10   | 2560     | 10      | 10  | 2560    | 1280    | 80       | 10  | 10   | 20       | 20       |
| 36 (1261)         | 10  | 2560   | 10      | 10       | 10  | 10   | 320      | 10      | 10  | 640     | 10      | 10       | 10  | 40   | 320      | 1280     |
| 39 (1225)         | 10  | 2560   | 20      | 1280     | 10  | 10   | 1280     | 10      | 10  | 10      | 40      | 160      | 10  | 10   | 20       | 10       |
| HR-Tet GMT        | 10  | 104    | 123     | 538      | 10  | 100  | 269      | 129     | 10  | 252     | 123     | 91       | 10  | 21   | 742      | 247      |
| 9 (1456)          | 10  | 10     | 10      | 10       | 10  | 10   | 10       | 10      | 10  | 10      | 10      | 10       | 10  | 10   | 10       | 10       |
| 31 (1117)         | 10  | 10     | 10      | 10       | 10  | 10   | 10       | 10      | 10  | 80      | 10      | 10       | 10  | 10   | 10       | 10       |
| 37 (1152)         | 10  | 20     | 10      | 10       | 10  | 10   | 10       | 10      | 10  | 10      | 10      | 10       | 10  | 10   | 10       | 10       |
| 38 (1209)         | 10  | 40     | 80      | 10       | 10  | 10   | 20       | 10      | 10  | 10      | 1280    | 10       | 10  | 10   | 10       | 10       |
| 17 (1174)         | 10  | 10     | 640     | 10       | 10  | 80   | 10       | 10      | 10  | 10      | 10      | 10       | 10  | 10   | 10       | 10       |
| 24 (1091)         | 10  | 160    | 1280    | 10       | 10  | 10   | 160      | 10      | 10  | 10      | 10      | 10       | 10  | 10   | 10       | 10       |
| 41 (1381)         | 10  | 10     | 20      | 10       | 10  | 160  | 10       | 10      | 10  | 10      | 10      | 10       | 10  | 10   | 10       | 10       |
| 44 (1439)         | 10  | 10     | 10      | 10       | 10  | 10   | 10       | 10      | 10  | 10      | 10      | 10       | 10  | 10   | 10       | 10       |
| 7 (1452)          | 10  | 10     | 10      | 10       | 10  | 10   | 10       | 10      | 10  | 10      | 10      | 10       | 10  | 10   | 10       | 10       |
| 14 (1138)         | 10  | 10     | 10      | 160      | 10  | 10   | 10       | 10      | 10  | 10      | 10      | 10       | 10  | 10   | 10       | 10       |
| 26 (1096)         | 10  | 10     | 10      | 10       | 10  | 40   | 10       | 10      | 10  | 10      | 10      | 10       | 10  | 20   | 10       | 10       |
| 32 (1121)         | 10  | 10     | 10      | 10       | 10  | 10   | 10       | 10      | 10  | 10      | 10      | 10       | 10  | 10   | 10       | 10       |
| 3 (1426)          | 10  | 10     | 10      | 10       | 10  | 10   | 10       | 10      | 10  | 10      | 10      | 10       | 10  | 10   | 10       | 10       |
| 11 (1464)         | 10  | 10     | 10      | 10       | 320 | 10   | 10       | 10      | 10  | 10      | 10      | 10       | 10  | 10   | 10       | 10       |
| 12 (1466)         | 10  | 10     | 10      | 10       | 10  | 10   | 10       | 10      | 10  | 10      | 10      | 10       | 10  | 10   | 160      | 10       |
| 19 (1206)         | 10  | 10     | 10      | 1280     | 10  | 1280 | 10       | 10      | 10  | 10      | 10      | 10       | 10  | 10   | 10       | 10       |
| Mock GMT          | 10  | 14     | 21      | 16       | 10  | 30   | 10       | 10      | 10  | 11      | 14      | 10       | 10  | 10   | 12       | 10       |
| HR-Tet vs. Mock   | NS  | p<0.05 | p<0.05  | p<0.0001 | NS  | NS   | p<0.0005 | p<0.001 | NS  | p<0.005 | p<0.005 | p<0.005  | NS  | NS   | p<0.0001 | p<0.0001 |
| WT-Tet vs. Mock   | NS  | p<0.02 | p<0.005 | p<0.02   | NS  | NS   | NS       | p<0.001 | NS  | NS      | p<0.01  | p<0.0001 | NS  | NS   | p<0.0001 | NS       |
| HR-Tet vs. WT-Tet | NS  | NS     | NS      | NS       | NS  | NS   | NS       | NS      | NS  | NS      | NS      | p<0.0001 | NS  | NS   | NS       | NS       |

Supplemental Figure 1. Plaque reduction neutralization test (PRNT) to 50% of control wells for individual animals. Geometric mean titers (GMT) shown are identical to those seen in Table 3. To determine significant changes in titers between groups, Tukey HSD tests were done. For all groups, no significant difference was noted between the three groups on Day 0 for any of the serotypes. For DV1, both HR-TET and WT-Tet GMTs were significantly higher than Mock titers ( $p<0.05$  and  $p<0.02$  respectively) on Day 14, Day 30 ( $p<0.05$  and  $p<0.005$  respectively), and Day 62 ( $p<0.0001$  and  $p<0.02$  respectively). There was no difference between WT-Tet and HR-TET for DV1 for any of the days tested. For DV2, no significant difference in GMT was noted between the three test groups on D14. By D30, HR-TET GMT was significantly different from the Mock GMT ( $p<.0005$ ) while there was no statistical difference in GMT for WT-Tet vs Mock or for HR-TET vs WT. On Day 62, both HR-TET and WT-Tet had GMTs significantly different from those of Mock vaccinated animals ( $p<0.001$  for both). For DV3, HR-Tet vaccinated animals had significantly higher GMTs compared to Mock vaccinated animals on Days 14, 30, and 62 ( $p<0.005$  for all days) whereas WT-Tet GMTs were only significantly different from Mock vaccinated animals on D30 and 62 ( $p<0.01$  and  $p<0.0001$  respectively). For DV4, there was no significant difference in GMT between the three groups on D14. By D30, both HR-TET and WT-Tet had GMTs significantly greater than those of Mock vaccinated animals ( $p<0.0001$  for both). This trend

continued for HR-TET out to D62, where HR-TET had a significantly elevated GMT compared to Mock ( $p < 0.0001$ ). At no time point was there a significant difference in GMT between HR-TET and WT-Tet animals.
